# Supplementary material for: The microbial metabolite imidazole propionate dysregulates bone homeostasis by inhibiting AMP-activated protein kinase (AMPK) signaling
Source: PubMed Central journal article supplement — Commun Biol. 2024 Dec 19;7:1644. doi: 10.1038/s42003-024-07316-w (PMC11655877; doi:10.1038/s42003-024-07316-w), 2024-12-19
Supplement: 42003_2024_7316_MOESM2_ESM.pdf [file 42003_2024_7316_MOESM2_ESM.pdf]

**The microbial metabolite imidazole propionate dysregulates bone homeostasis by  
inhibiting AMP-activated protein kinase (AMPK) signaling**

Suk-Gyun Park<sup>1,2</sup>, Jung-Woo Kim<sup>1,2</sup>, Ju Han Song<sup>1,2</sup>, Seung-Hee Kwon<sup>1,2</sup>, Sin-Hye Oh<sup>1,2</sup>,  
Xianyu Piao<sup>1,2</sup>, Zhao Wang<sup>1,2</sup>, Je-Hwang Ryu<sup>1,2</sup>, Nacksung Kim<sup>2,3</sup>, Ok-Su Kim<sup>2,4</sup>, & Jeong-  
Tae Koh<sup>1,2,\*</sup>

<sup>1</sup>Department of Pharmacology and Dental Therapeutics, School of Dentistry, Chonnam  
National University, Gwangju 61186, Republic of Korea

<sup>2</sup>Hard-Tissue Biointerface Research Center, School of Dentistry, Chonnam National  
University, Gwangju 61186, Republic of Korea

<sup>3</sup>Department of Pharmacology, Chonnam National University Medical School, Gwangju  
61469, Republic of Korea

<sup>4</sup>Department of Periodontology, School of Dentistry, Chonnam National University, Gwangju  
61186, Republic of Korea

\*Corresponding author.

Jeong-Tae Koh, DDS, PhD

E-mail: [jtkoh@chonnam.ac.kr](mailto:jtkoh@chonnam.ac.kr)

## Supplementary Figures

**a**

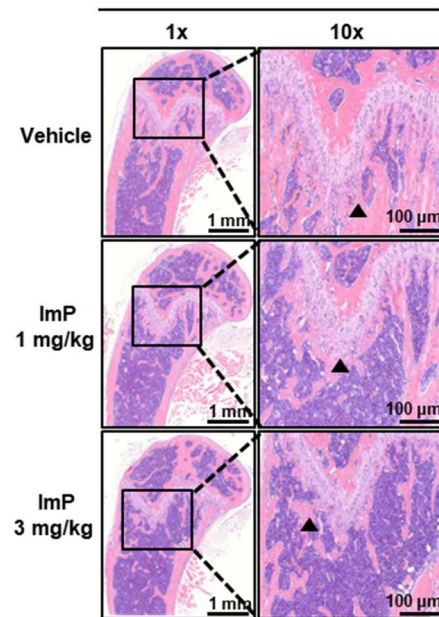

**Supplementary Figure 1. Histological staining confirmed that ImP inhibited bone formation in animals. a** Mice were treated with ImP (1 mg/kg, 3 mg/kg), harvested 4 weeks later, and H&E staining was performed (n=3). Black triangle, bone; ImP, imidazole propionate; H&E, hematoxylin and eosin.

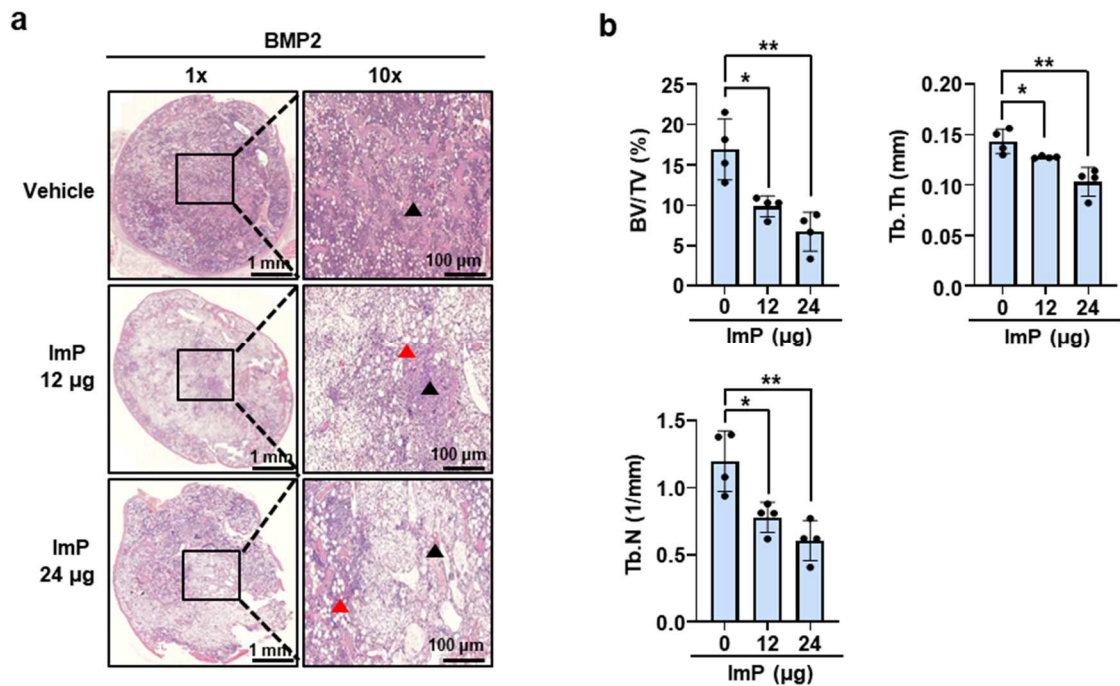

**Supplementary Figure 2. The microbial metabolite ImP inhibits bone formation in an ectopic bone formation model. a, b** ImP (12 and 24 µg) and BMP2 (3 µg) were administered into subcutaneous space of the back with collagen sponge, and ectopic bones were harvested 4 weeks later (n=4). H&E (**a**) and bone parameter (**b**) analyses were performed. Black triangle, bone; Red triangle, adipocyte; ImP, imidazole propionate; BV/TV, percentage bone volume; Tb.N, trabecular number; Tb.Th, trabecular thickness; H&E, hematoxylin and eosin. Values are presented as the mean ± SD; \*,  $P < 0.05$ ; \*\*,  $P < 0.01$ ; compared to the control group.

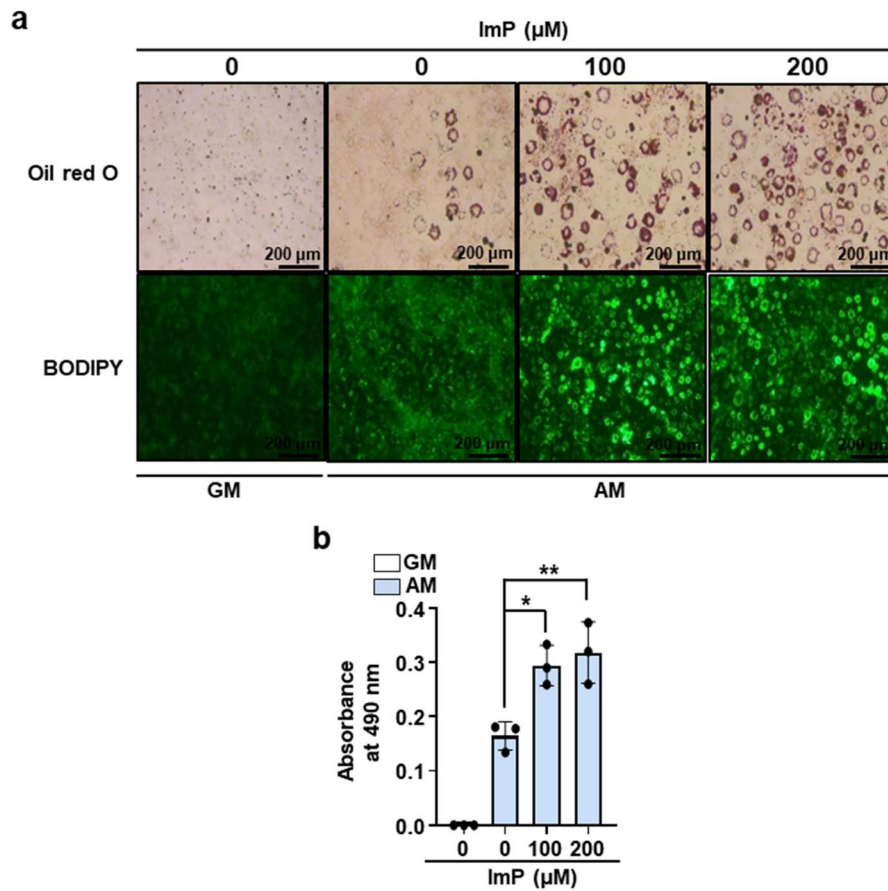

**Supplementary Figure 3. ImP stimulates adipocyte differentiation in 3T3-L1 cells. a, b** 3T3-L1 adipocytes were cultured for 6 days and stained with oil red O (upper panel) and BODIPY (lower panel). Quantification of oil red O staining is shown in panel b (n=3). ImP, imidazole propionate; GM, growth media; AM, adipogenic media (1 μg/ml insulin, 2 μM rosiglitazone, and 100 nM dexamethasone). Values are presented as the mean ± SD; \*,  $P < 0.05$ ; \*\*,  $P < 0.01$ ; compared to the control group.

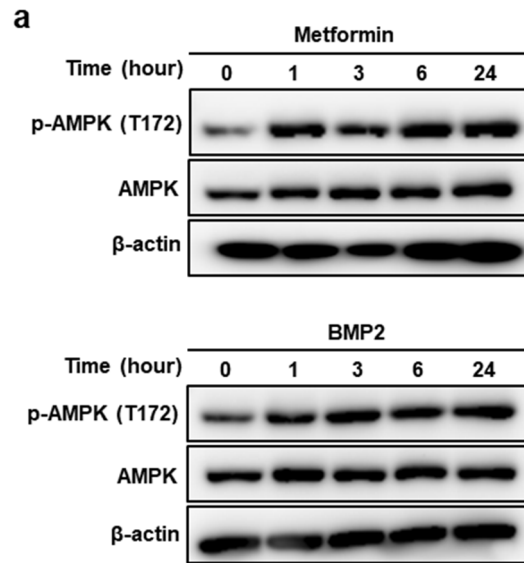

**Supplementary Figure 4. Metformin and BMP2 promote phosphorylation of AMPK. a, b** BMSCs were treated with metformin (100  $\mu$ M) or BMP2 (100 ng/ml) for 0, 1, 3, 6, and 24 h. Western blot analysis was performed with antibodies against phosphorylated form of AMPK (T172) and non-phosphorylated AMPK (n=3).

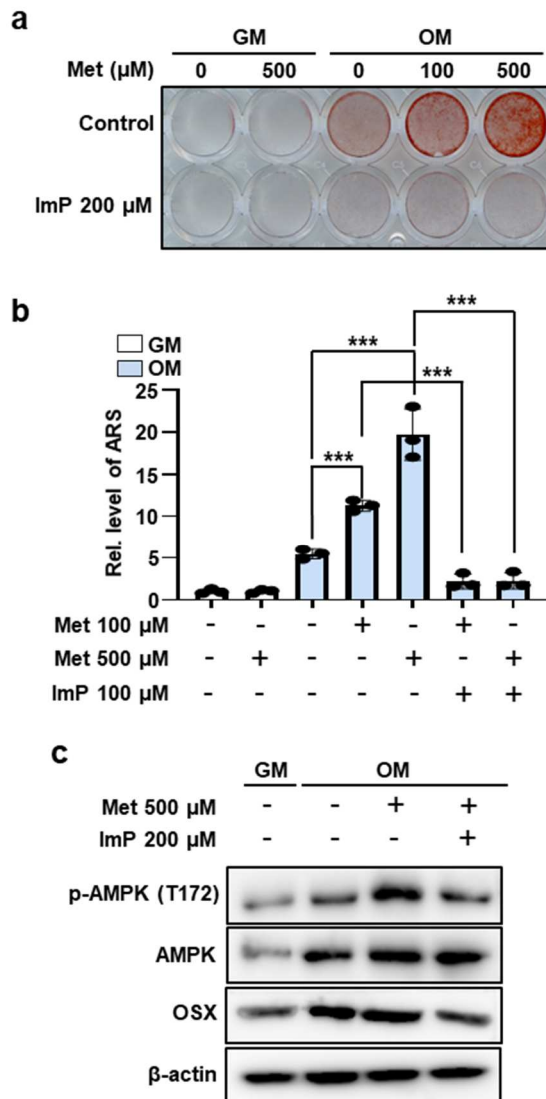

**Supplementary Figure 5. ImP inhibits metformin-induced matrix calcification in BMSCs.**

**a–c** BMSCs were cultured with metformin in osteogenic medium for 14 days. **a** Alizarin red S staining was performed to assess calcification (n=3). **b** The staining was quantified using 10% cetylpyridinium chloride (n=3). **c** BMSCs were cultured with metformin and ImP in osteogenic medium for 4 days, and western blot analysis was performed with antibodies against OSX, and p-AMPK (n=3). ImP, imidazole propionate; BMSC, bone marrow stromal cell; OM, osteogenic media (50  $\mu\text{g/ml}$  ascorbic acid and 5 mM  $\beta$ -glycerophosphate). Values are presented as the mean  $\pm$  SD; \*\*\*,  $P < 0.001$ ; compared to the control group.

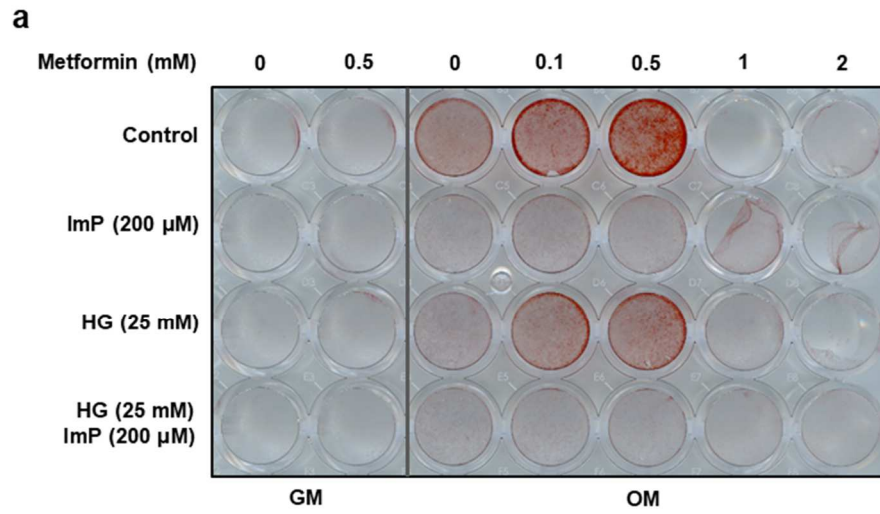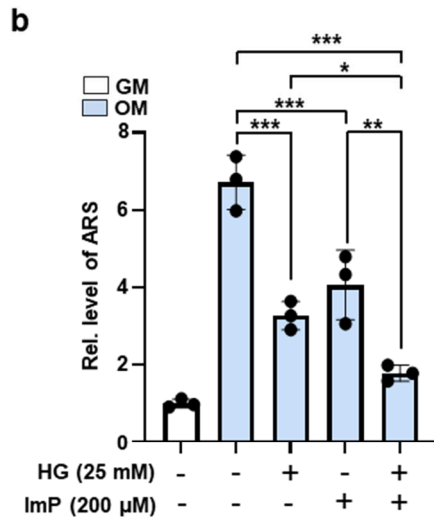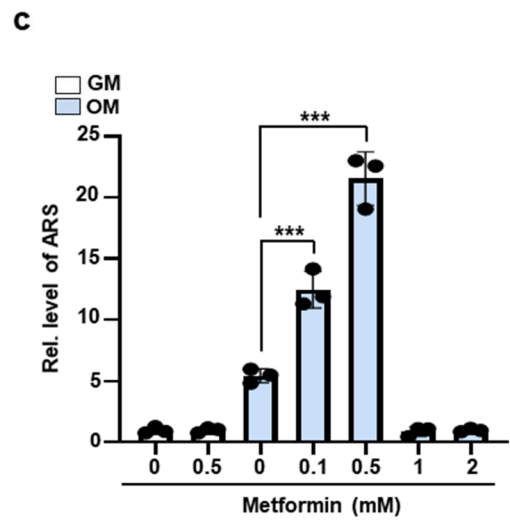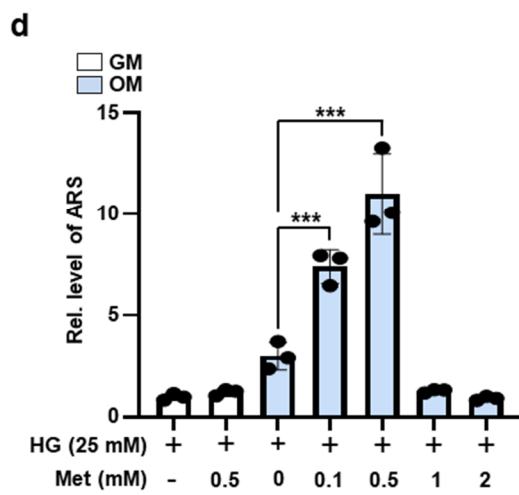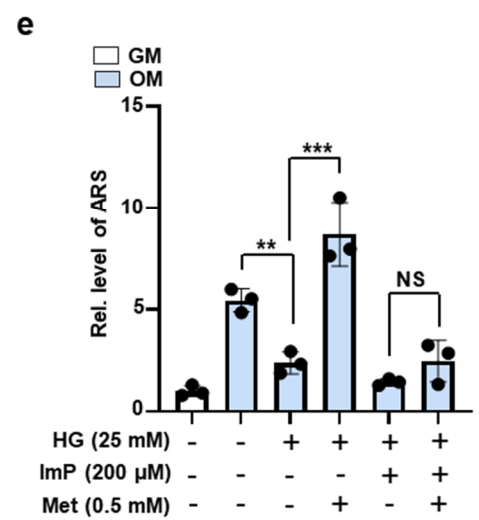

**Supplementary Figure 6. Changes in calcium deposition in BMSCs cultured under high glucose conditions with metformin and ImP treatments.** a BMSCs were cultured under high glucose conditions (25 mM) with each drug, and calcium deposition was assessed using Alizarin Red staining (n=3). b Calcium deposition decreased under high glucose and ImP-treated conditions (n=3). c Metformin increased calcium deposition (n=3). d Under high glucose conditions, metformin also increased calcium deposition (n=3). e ImP treatment further reduced calcium deposition in the presence of both high glucose and metformin (n=3). ImP, imidazole propionate; BMSC, bone marrow stromal cell; HG, High glucose; Met, Metformin; GM, Growth medium; OM, Osteogenic medium. Values are presented as the mean  $\pm$  SD; NS, non-significant; \*,  $P < 0.05$ ; \*\*,  $P < 0.01$ ; \*\*\*,  $P < 0.001$ ; compared to the control group. \*\*\*,  $P < 0.001$ ; compared to the control group.



## Supplementary Figure 7. Uncropped and unedited blot/gel images

Figure 2

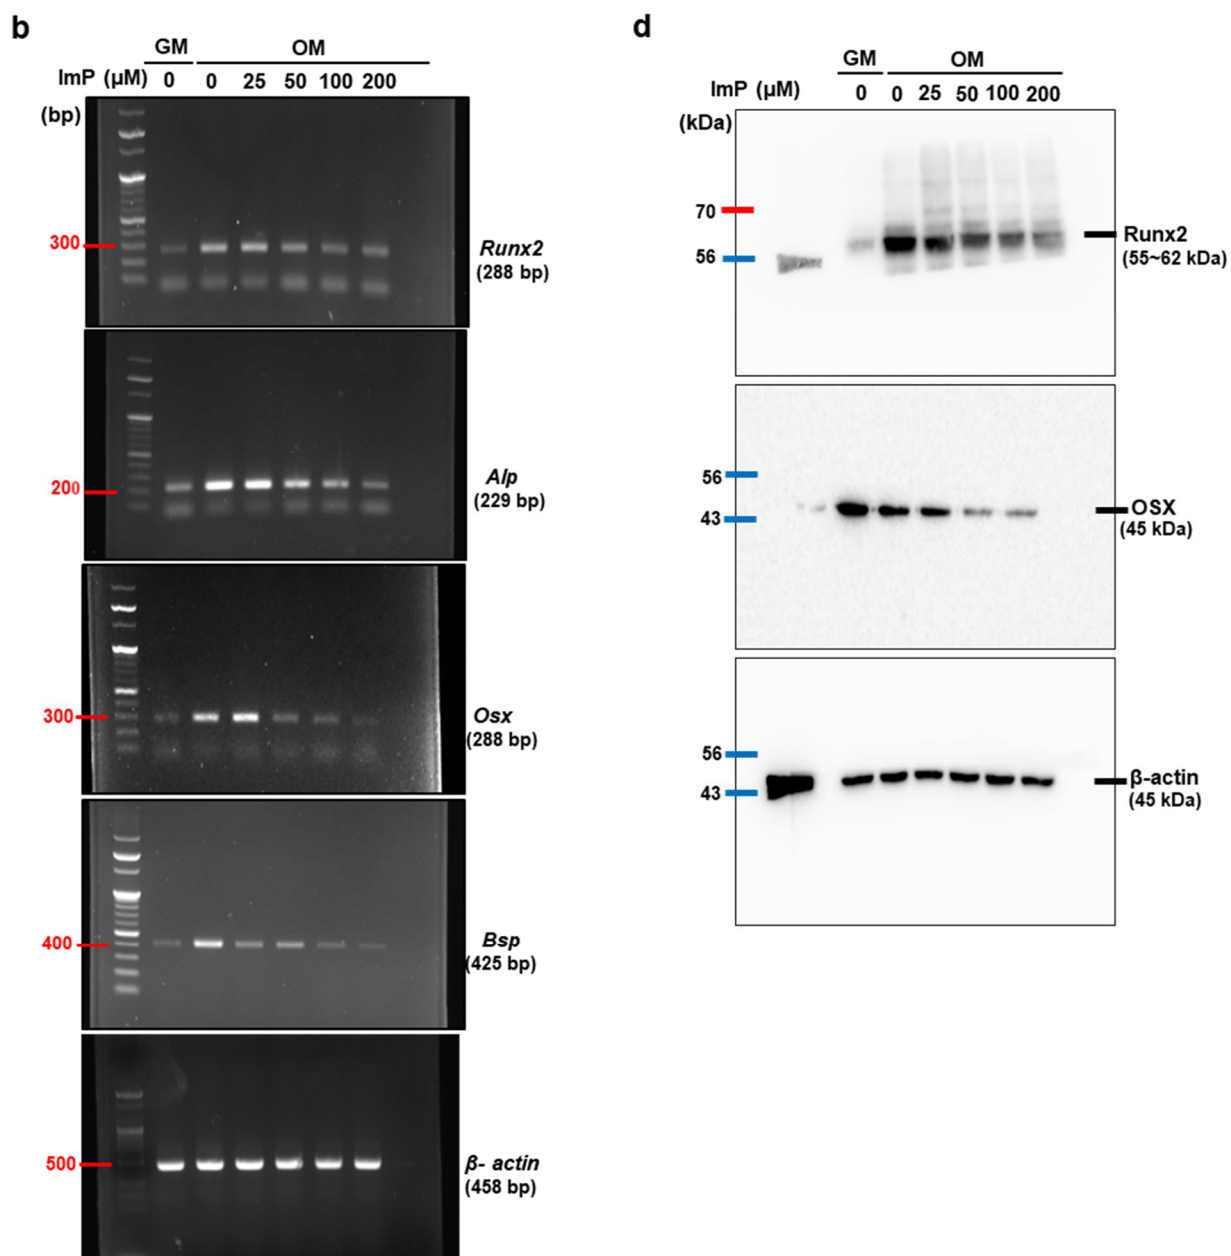

## Supplementary Figure 7. Uncropped and unedited blot/gel images

Figure 3

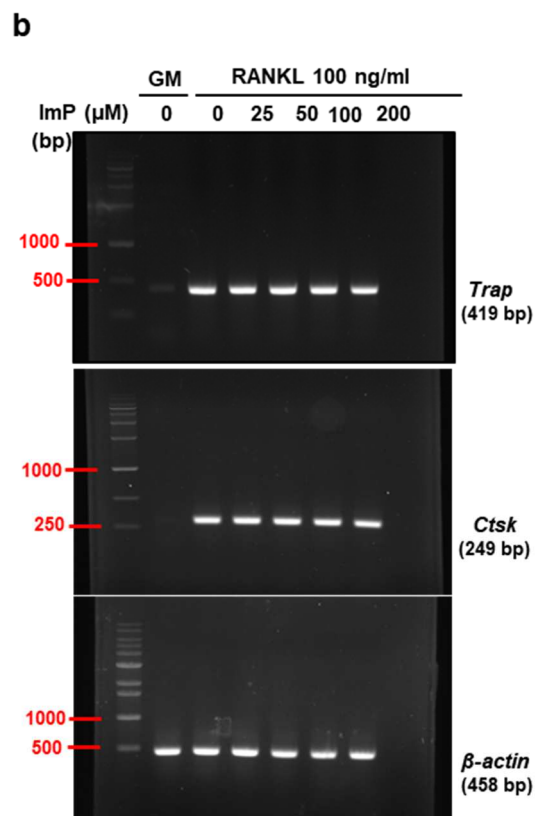

# Supplementary Figure 7. Uncropped and unedited blot/gel images

## Figure 4

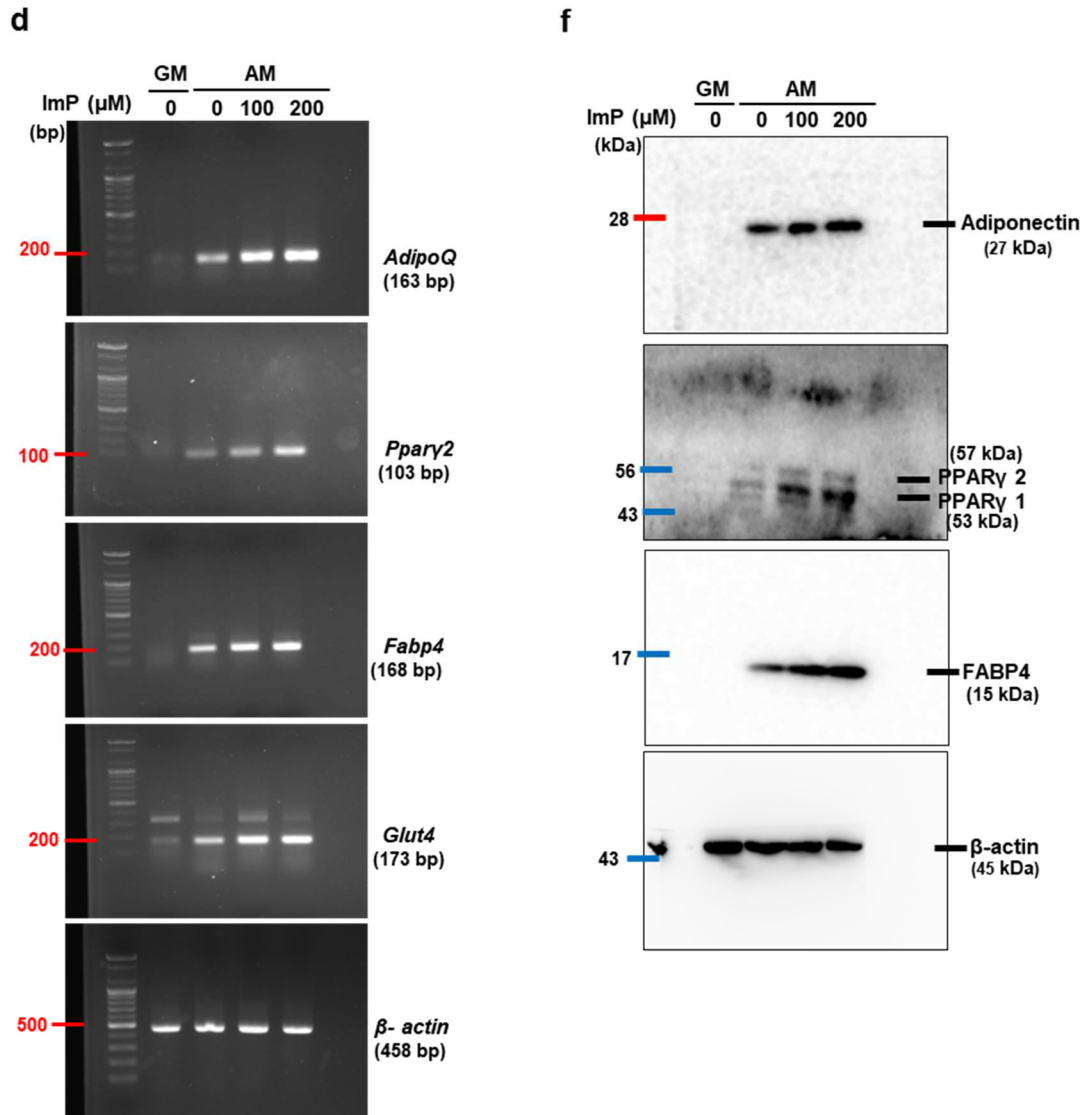

## Supplementary Figure 7. Uncropped and unedited blot/gel images

Figure 5

a

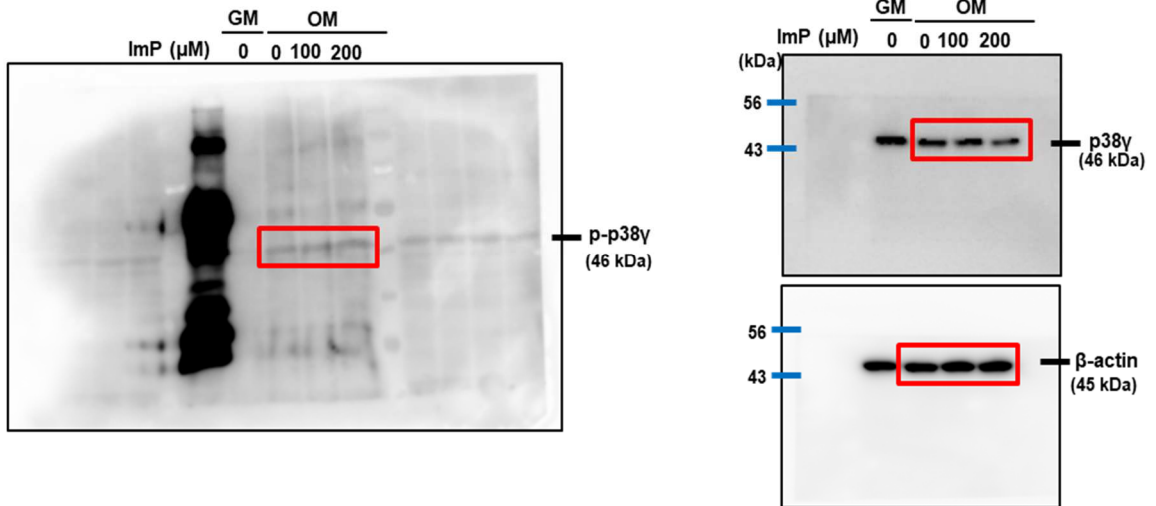

c

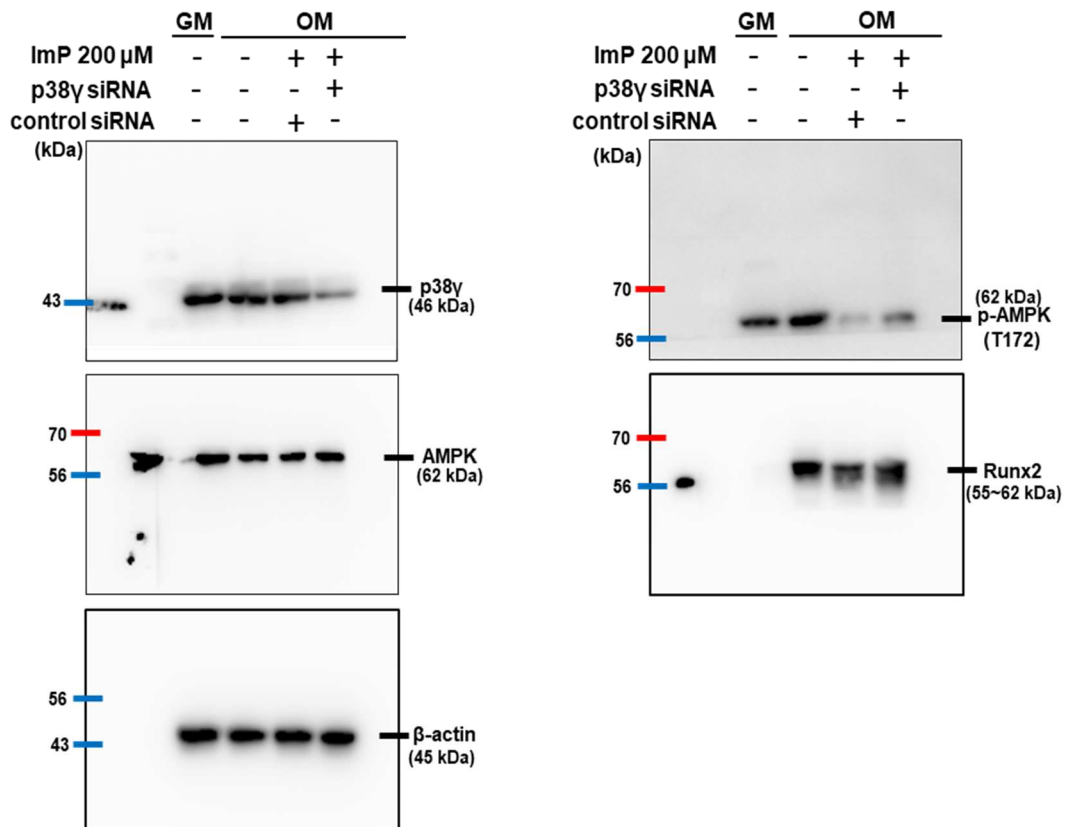

Supplementary Figure 7. Uncropped and unedited blot/gel images

Figure 6

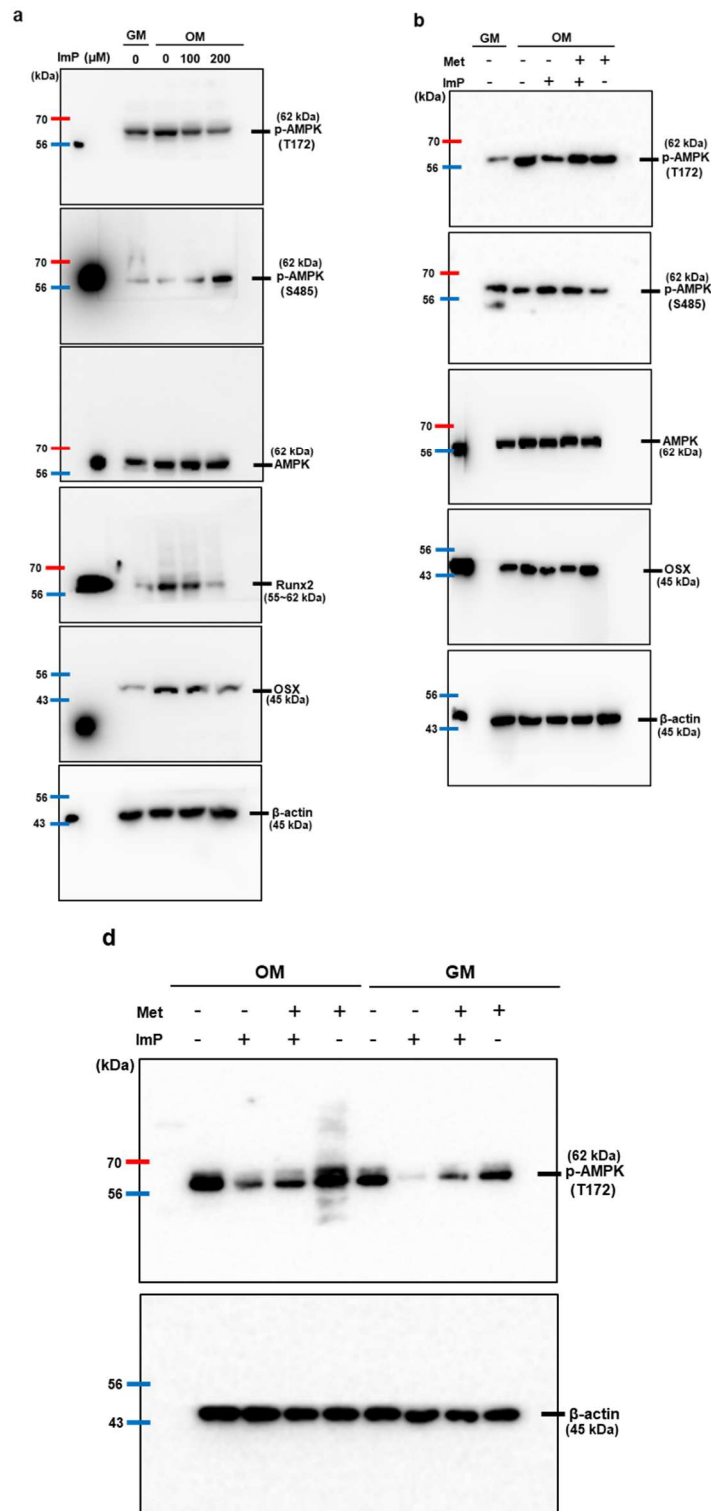

Supplementary Figure 7. Uncropped and unedited blot/gel images

Figure 7

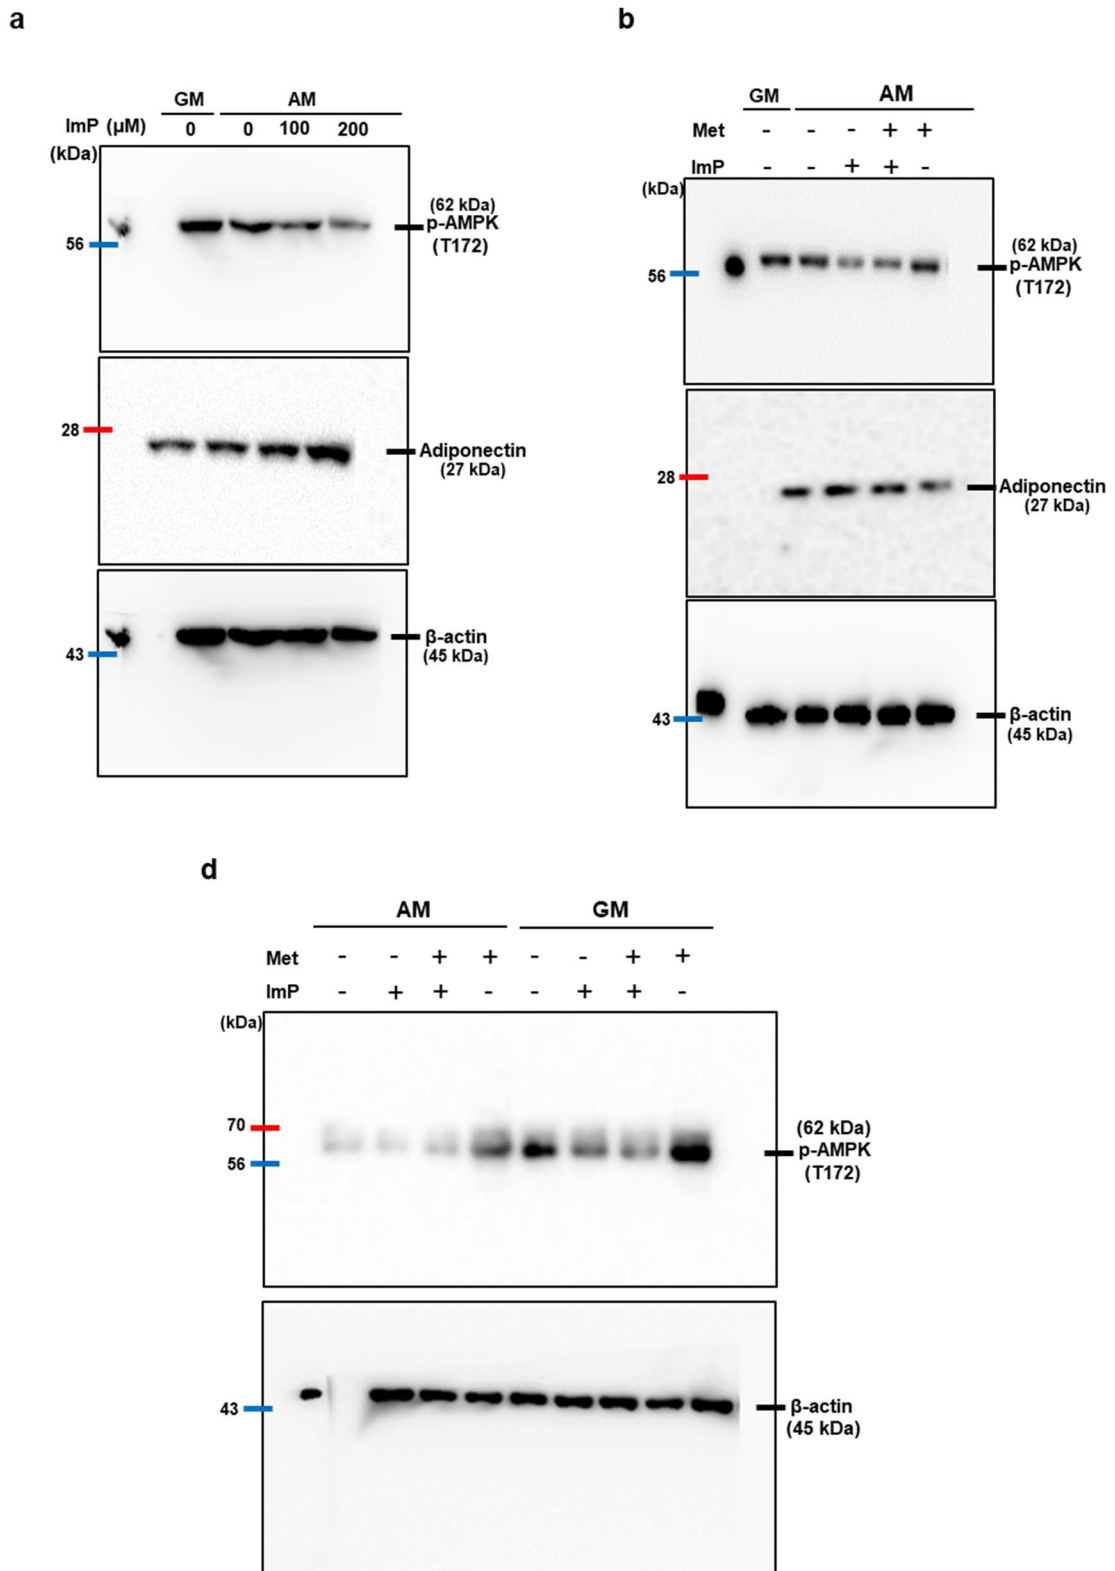

## Supplementary Figure 7. Uncropped and unedited blot/gel images

### Supplementary Figure 4

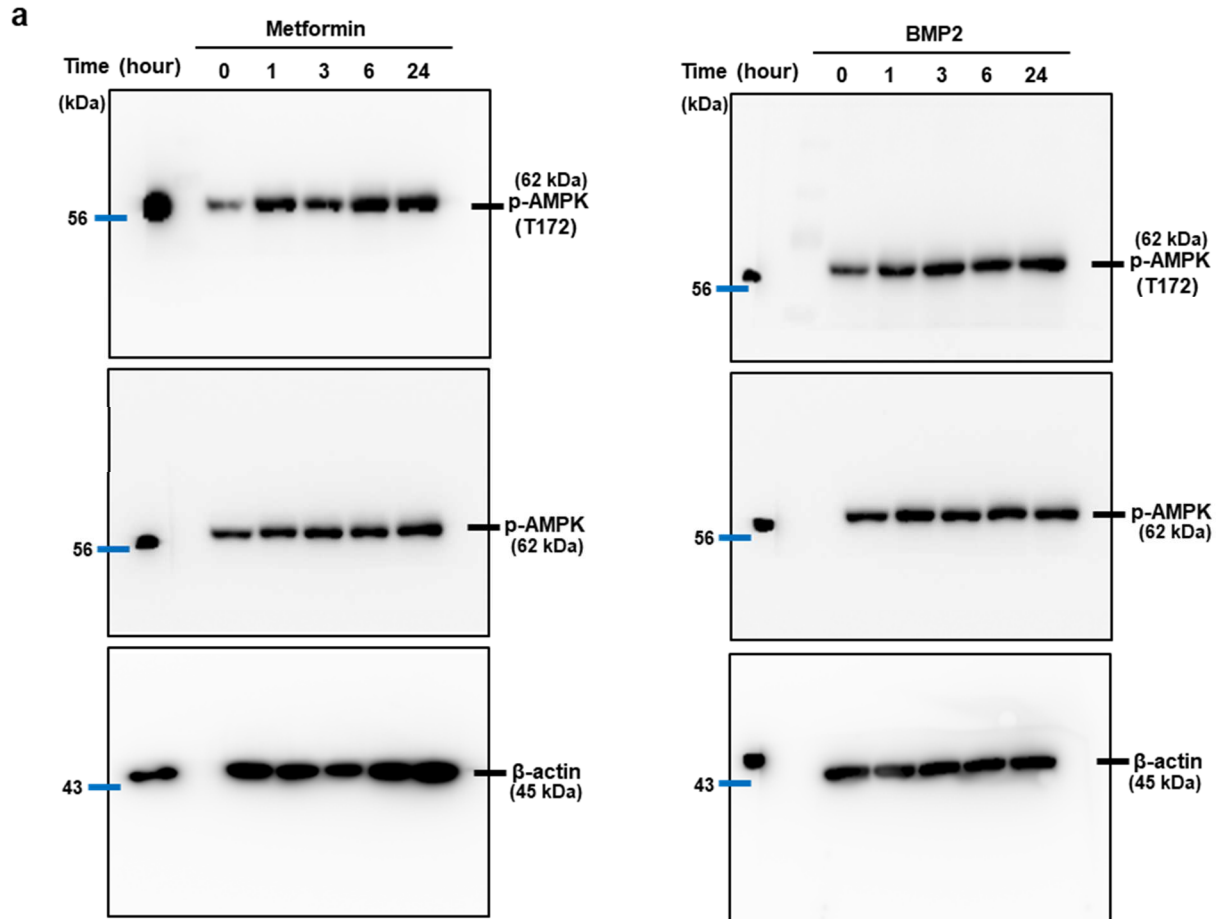

# Supplementary Figure 7. Uncropped and unedited blot/gel images

## Supplementary Figure 5

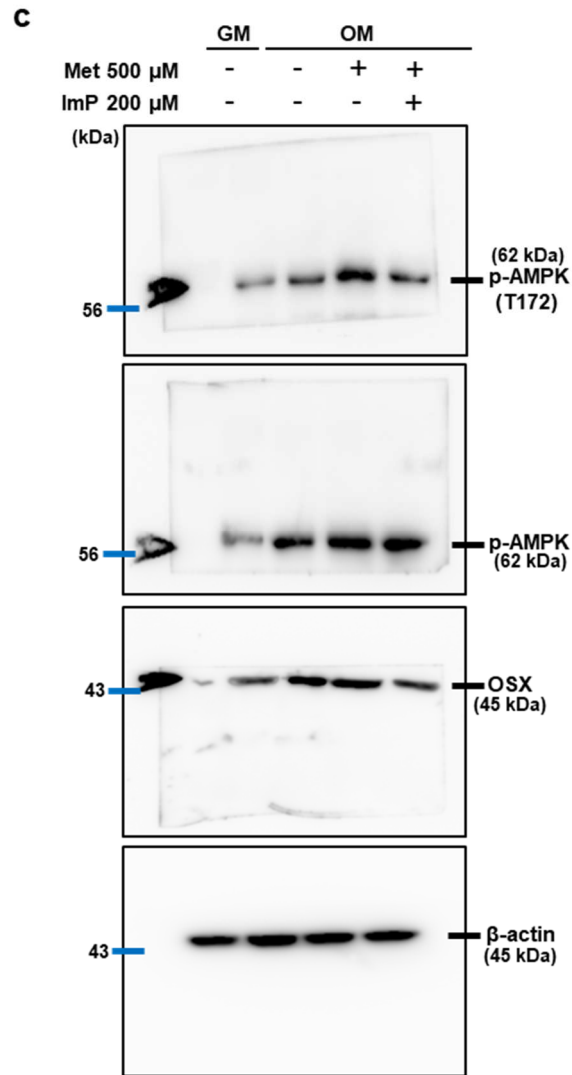



**Supplementary Table 1. List of Primers**

|                                                    |                                    |
|----------------------------------------------------|------------------------------------|
| <b><i>Alp</i></b><br>(229 bp)                      | (F) 5'-TACATTCCCCATGTGATGGC-3'     |
|                                                    | (R) 5'-ACCTCTCCCTTGAGTGTGGG-3'     |
| <b><i>Bsp</i></b><br>(425 bp)                      | (F) 5'-ACACTTACCGAGCTTATGAG-3'     |
|                                                    | (R) 5'-AGGTTCCCCGTTCTCACTTT-3'     |
| <b><i>Oc</i></b><br>(147 bp)                       | (F) 5'-GTTTGTAGGCGGTCTTCAAGC-3'    |
|                                                    | (R) 5'-GCAATAAGGTAGTGAACAGAC-3'    |
| <b><i>Osx</i></b><br>(288 bp)                      | (F) 5'-TGAGGAAGAAGCCCATTAC- 3'     |
|                                                    | (R) 5'-ACTTCTTCTCCCGGGTGTG-3'      |
| <b><i>Runx2</i></b><br>(288 bp)                    | (F) 5'-TCTCCAACCCACGAATGCACTA-3'   |
|                                                    | (R) 5'-ATAGCGTGCTGCCATTCGAGGT-3'   |
| <b><i>AdipoQ</i></b><br>(163 bp)                   | (F) 5'-CCTGGAGAAGCCGCTTATGT-3'     |
|                                                    | (R) 5'-AGAGTCCCGGAATGTTGCAG-3'     |
| <b><i>Ppar<math>\gamma</math>2</i></b><br>(103 bp) | (F) 5'-TCGCTGATGCACTGCCTATG-3'     |
|                                                    | (R) 5'-GAGAGGTCCACAGAGCTGATT-3'    |
| <b><i>Glut4</i></b><br>(173 bp)                    | (F) 5'-AATGTCCTTGCTCCAGCTCC-3'     |
|                                                    | (R) 5'-CAGCTCCTATGGTGGCGTAG-3'     |
| <b><i>Fabp4</i></b><br>(168 bp)                    | (F) 5'-TACATGAAAGAAGTGGGAGTG-3'    |
|                                                    | (R) 5'-GGTGATTTTCATCGAATTCCAC-3'   |
| <b><i>CtsK</i></b><br>(249 bp)                     | (F) 5'-TACCCATATGTGGGCCAGGA-3'     |
|                                                    | (R) 5'-ATAGCCCACCACCAACTG-3'       |
| <b><i>Trap</i></b><br>( 419 bp)                    | (F) 5'-TCCGTGCTCGGCGATGGACCAGA-3'  |
|                                                    | (R) 5'-CTGGAGTGCACGATGCCAGCGACA-3' |
| <b><i><math>\beta</math>-actin</i></b><br>(458 bp) | (F) 5'-TTCTTTGCAGCTCCTTCGTTGCCG-3' |
|                                                    | (R) 5'-TGGATGGCTACGTACATGGCTGGG-3' |
| <b><i>p38<math>\gamma</math></i></b><br>(100 bp)   | (F) 5'-CAGAGTGCAGAGGCCAAGAA-3'     |
|                                                    | (R) 5'-GATTCACAGCCTGAGGGCTT-3'     |
| <b><i>18S rRNA</i></b>                             | (F) 5'-GGCCGTTCTTAGTTGGTGGGA-3'    |
|                                                    | (R) 5'-CCCGACATCTAAGGGCATC-3'      |
