# Supplementary material for: The microbial metabolite imidazole propionate dysregulates bone homeostasis by inhibiting AMP-activated protein kinase (AMPK) signaling
Source: PubMed Central journal article supplement — Commun Biol. 2024 Dec 19;7:1644. doi: 10.1038/s42003-024-07316-w (PMC11655877; doi:10.1038/s42003-024-07316-w), 2024-12-19
Supplement: 42003_2024_7316_MOESM4_ESM.pdf [file 42003_2024_7316_MOESM4_ESM.pdf]

## **Description of Additional Supplementary Files**

1

2

3 **File name:** Supplementary Data 1

4 **Description:** The source data for the graphs in Figures 1–7 of the main manuscript and  
5 supplementary figures 2, 3, 5, and 6
